# Supplementary material for: High expression of Endogenous Retroviruses from intrauterine life to adulthood in two mouse models of Autism Spectrum Disorders
Source: PubMed Central journal article supplement (PMC5766538; doi:10.1038/s41598-017-19035-w), 2018-01-12
Supplement: 41598_2017_19035_MOESM1_ESM.pdf [file 41598_2017_19035_MOESM1_ESM.pdf]

## **Supplementary information**

### **High expression of Endogenous Retroviruses from intrauterine life to adulthood in two mouse models of Autism Spectrum Disorders.**

Chiara Cipriani, Laura Ricceri, Claudia Matteucci, Alessia De Felice, Anna Maria Tartaglione, Ayele Argaw-Denboba, Francesca Pica, Sandro Grelli, Gemma Calamandrei, Paola Sinibaldi Vallebona, Emanuela Balestrieri.

**Supplementary table S1. Median value and interquartile range (IQR) of the ERVs transcriptional activity in C57BL6/J, BTBR, vehicle- and VPA-treated mice**

|                            |          | <b>ETnI</b>                          | <b>ETnI-<math>\alpha</math></b> | <b>ETnI-<math>\beta</math></b>     | <b>ETnI-<math>\gamma</math></b> | <b>MusD</b>                   | <b>IAP</b>                  |
|----------------------------|----------|--------------------------------------|---------------------------------|------------------------------------|---------------------------------|-------------------------------|-----------------------------|
| <b>Whole embryos</b>       |          |                                      |                                 |                                    |                                 |                               |                             |
| <b>GD 10.5</b>             | C57BL6/J | 1.11 (0.84-1.45)*                    | 0.59 (0.32-0.81)                | 0.46 (0.17-0.75)                   | 0.42 (0.24-0.89)                | 0.58 (0.29-0.84)              | 0.35 (0.25-0.79)            |
| <b>GD 10.5</b>             | BTBR     | 26.09 (6.60-42.14)                   | 6.46 (5.39-8.49)                | 22.95 (14.37-26.20)                | 14.50 (8.06-19.68)              | 6.10 (4.23-8.93)              | 5.24 (3.51-9.11)            |
| <b>Blood</b>               |          |                                      |                                 |                                    |                                 |                               |                             |
| <b>PND 1</b>               | C57BL6/J | 1.01 (0.75-2.24)                     | 0.92 (0.49-2.50)                | 1.73 (0.57-3.06)                   | 0.89 (0.61-2.12)                | 1.20 (0.64-1.50)              | 0.93 (0.76-1.67)            |
|                            | BTBR     | 27.24 (2.96-70.46)                   | 27.70 (6.66-64.91)              | 31.71 (6.03-95.97)                 | 12.97 (2.61-118.85)             | 101.46 (34.87-330.42)         | 626.35 (372.58-1099.51)     |
| <b>PND 7</b>               | C57BL6/J | 4.40 (0.80-7.23)                     | 4.44 (2.50-8.06)                | 3.06 (0.58-8.61)                   | 7.40 (1.98-12.93)               | 4.14 (0.86-7.03)              | 3.03 (0.93-6.21)            |
|                            | BTBR     | 34.28 (12.85-53.48)                  | 24.48 (7.03-46.68)              | 24.12 (5.76-52.26)                 | 2.91 (1.32-3.99)                | 86.37 (59.98-111.37)          | 4363.34 (1808.96-6931.73)   |
| <b>PND 23</b>              | C57BL6/J | 3.88 (2.42-5.59)                     | 2.21 (1.54-3.76)                | 0.87 (0.53-1.78)                   | 2.11 (0.96-2.44)                | 6.51 (5.70-10.67)             | 1.94 (1.65-2.79)            |
|                            | BTBR     | 73.42 (24.84-150.36)                 | 46.29 (19.50-79.75)             | 19.78 (16.01-80.58)                | 14.93 (7.60-28.93)              | 191.28 (98.82-244.63)         | 1352.37 (622.19-2232.53)    |
| <b>PND 120</b>             | C57BL6/J | 9.72 (6.53-12.35)                    | 21.50 (18.64-24.89)             | 16809.63 (11917.83-46174.40)       | 0.07 (0.02-0.14)                | 37.58 (30.06-49.21)           | 59.47 (43.12-75.67)         |
|                            | BTBR     | 34540.47 (25851.42-39126.47)         | 4317.56 (2222.23-4568.37)       | 5261344.18 (3764067.70-6637975.59) | 150.17 (86.52-630.84)           | 1554.25 (1269.00-2299.96)     | 10219.24 (5825.05-38254.90) |
| <b>Brain</b>               |          |                                      |                                 |                                    |                                 |                               |                             |
| <b>PND 1</b>               | C57BL6/J | 1.24 (0.56-3.36)                     | 0.82 (0.72-1.81)                | 0.85 (0.69-1.84)                   | 0.84 (0.69-1.84)                | 0.78 (0.68-2.08)              | 0.88 (0.72-1.66)            |
|                            | BTBR     | 141040.75 (54479.72-331983.19)       | 3439.08 (810.42-6627.96)        | 5122.80 (377.31-9428.21)           | 2504.34 (338.34-4406.849)       | 275.65 (58.33-1046.64)        | 645.56 (163.59-1453.69)     |
| <b>PND 7</b>               | C57BL6/J | 3.41 (1.49-29.21)                    | 4.21 (1.51-11.21)               | 2.57 (2.15-15.87)                  | 4.45 (1.82-15.50)               | 2.83 (1.74-12.32)             | 2.11 (0.55-12.30)           |
|                            | BTBR     | 5005039.32 (40516.56-8839493.09)     | 5643.89 (88.11-53558.12)        | 2766.45 (244.07-22342.22)          | 688.14 (262.87-3016.69)         | 665.11 (117.93-3231.60)       | 581.59 (24.24-3633.68)      |
| <b>PND 23</b>              | C57BL6/J | 16.74 (4.05-75.31)                   | 1.32 (0.14-6.57)                | 2.43 (0.17-7.38)                   | 1.44 (0.16-9.32)                | 2.01 (0.16-4.60)              | 2.08 (0.15-5.24)            |
|                            | BTBR     | 22839.51 (8465.44-131994.98)         | 778.40 (68.09-2811.61)          | 2793.92 (97.04-5438.71)            | 565.17 (58.63-2304.37)          | 191.82 (16.14-484.95)         | 61.50 (20.21-668.48)        |
| <b>PND 120</b>             | C57BL6/J | 57.43 (11.23-86.05)                  | 0.22 (0.13-0.42)                | 19.33 (16.44-41.89)                | 0.03 (0.03-0.08)                | 8.49 (5.63-18.55)             | 19.63 (18.32-26.57)         |
|                            | BTBR     | 16247900.80 (5763050.67-20078866.80) | 10586.95 (7755.76-23383.41)     | 90303.86 (30814.41-134161.89)      | 10217.47 (2510.54-19009.77)     | 58911.02 (31782.57-100689.42) | 30257.39 (7121.51-37646.55) |
| <b>Whole embryos</b>       |          |                                      |                                 |                                    |                                 |                               |                             |
| <b>24 h pt<sup>#</sup></b> | Vehicle  | 1.58 (0.42-2.75)                     | 1.78 (0.30-3.17)                | 1.46 (0.26-3.73)                   | 3.03 (0.46-4.59)                | 1.65 (0.42-5.90)              | 1.54 (0.57-8.10)            |
| <b>3h pt</b>               | VPA      | 6.35 (2.72-25.62)                    | 2.86 (1.47-8.54)                | 2.92 (0.49-13.76)                  | 35.38 (16.34-143.44)            | 46.25 (11.99-105.35)          | 56.19 (12.64-146.21)        |
| <b>24 h pt</b>             | VPA      | 7.29 (1.69-29.30)                    | 2.75 (1.40-11.31)               | 3.33 (1.22-14.88)                  | 40.56 (1.84-78.65)              | 59.94 (3.54-128.35)           | 55.88 (3.44-168.13)         |
| <b>Blood</b>               |          |                                      |                                 |                                    |                                 |                               |                             |
| <b>PND 1</b>               | Vehicle  | 2.06 (0.27-4.80)                     | 0.76 (0.33-4.26)                | 1.56 (0.50-7.30)                   | 0.92 (0.34-4.08)                | 0.68 (0.32-2.83)              | 1.62 (0.52-3.58)            |
|                            | VPA      | 192.60 (118.68-245.42)               | 48.83 (25.56-78.61)             | 71.09 (15.63-114.83)               | 6.30 (3.28-11.34)               | 119.00 (49.60-196.22)         | 252.58 (126.53-346.22)      |
| <b>PND 7</b>               | Vehicle  | 14.93 (5.78-44.60)                   | 0.65 (0.25-1.21)                | 0.05 (0.01-0.14)                   | 0.15 (0.04-0.60)                | 2.86 (1.30-5.54)              | 24.72 (11.01-62.93)         |
|                            | VPA      | 32.00 (10.84-65.38)                  | 3.60 (0.86-12.66)               | 8.20 (2.89-13.58)                  | 0.80 (0.18-2.26)                | 24.34 (6.77-130.99)           | 43.27 (22.25-79.83)         |
| <b>PND 23</b>              | Vehicle  | 7.06 (6.58-12.71)                    | 4.74 (1.93-8.20)                | 1.96 (1.13-6.17)                   | 3.78 (1.55-5.68)                | 15.19 (10.70-30.02)           | 143.68 (42.91-255.86)       |
|                            | VPA      | 23.78 (14.64-44.60)                  | 6.70 (3.92-13.78)               | 32.03 (18.81-38.16)                | 0.75 (0.38-1.16)                | 37.82 (22.34-58.22)           | 41.69 (26.18-106.64)        |
| <b>PND 120</b>             | Vehicle  | 0.22 (0.04-4.37)                     | 1.74 (0.46-9.24)                | 0.02 (0.01-0.09)                   | 0.40 (0.14-1.00)                | 48.54 (30.37-306.59)          | 23.25 (9.90-44.74)          |
|                            | VPA      | 0.74 (0.11-4.70)                     | 5.84 (1.66-18.50)               | 0.09 (0.06-0.15)                   | 0.85 (0.58-19.12)               | 90.66 (26.88-284.00)          | 36.32 (18.15-149.50)        |
| <b>Brain</b>               |          |                                      |                                 |                                    |                                 |                               |                             |
| <b>PND 1</b>               | Vehicle  | 0.72 (0.56-1.78)                     | 1.22 (0.10-11.15)               | 1.38 (0.29-2.60)                   | 4.11 (0.03-27.57)               | 0.89 (0.09-7.68)              | 0.65 (0.40-3.85)            |
|                            | VPA      | 360.38 (91.14-654.77)                | 938.78 (320.38-1887.11)         | 151.03 (27.55-404.21)              | 874.60 (185.27-2461.36)         | 199.11 (58.62-333.44)         | 192.82 (51.64-663.14)       |
| <b>PND 7</b>               | Vehicle  | 0.84 (0.38-1.79)                     | 0.46 (0.21-4.27)                | 1.34 (0.62-5.13)                   | 0.20 (0.03-13.80)               | 0.71 (0.25-2.02)              | 0.63 (0.21-2.21)            |
|                            | VPA      | 137.11 (38.72-230.00)                | 390.00 (44.63-899.42)           | 80.45 (50.19-168.57)               | 101.93 (2.58-1521.95)           | 217.44 (19.82-325.03)         | 211.92 (31.66-561.95)       |
| <b>PND 23</b>              | Vehicle  | 0.47 (0.20-2.00)                     | 0.50 (0.16-6.88)                | 0.92 (0.15-2.53)                   | 1.31 (0.03-13.47)               | 0.40 (0.10-3.01)              | 0.75 (0.22-5.51)            |
|                            | VPA      | 51.43 (5.51-90.25)                   | 99.20 (38.83-580.73)            | 94.78 (58.12-810.97)               | 29.60 (13.61-128.13)            | 30.26 (4.90-115.00)           | 33.90 (3.40-60.62)          |
| <b>PND 120</b>             | Vehicle  | 2.08 (0.99-5.11)                     | 4.61 (0.14-10.97)               | 0.92 (0.64-1.61)                   | 11.71 (0.05-23.71)              | 4.09 (0.50-12.67)             | 3.50 (0.40-8.82)            |
|                            | VPA      | 358.65 (76.80-714.76)                | 830.81 (558.00-1428.24)         | 250.41 (133.14-385.06)             | 578.75 (186.27-2578.15)         | 295.46 (220.32-423.74)        | 388.58 (183.29-718.26)      |

<sup>#</sup> hours post treatment

\* median value (IQR)

**Supplementary table S2. Median value and interquartile range (IQR) of the cytokines and TLRs expression levels in C57BL6/J, BTBR, vehicle- and VPA-treated mice**

|                            |          | IL-1 $\beta$                     | IL-6                  | TNF- $\alpha$          | TLR3                      | TLR4                      |
|----------------------------|----------|----------------------------------|-----------------------|------------------------|---------------------------|---------------------------|
| <b>Whole embryos</b>       |          |                                  |                       |                        |                           |                           |
| <b>GD 10.5</b>             | C57BL6/J | 1.00 (0.61-1.96)*                | 1.28 (0.64-1.86)      | 1.50 (0.23-4.80)       | 1.26 (0.24-4.17)          | 0.88 (0.43-2.95)          |
| <b>GD 10.5</b>             | BTBR     | 23.32 (16.19-29.80)              | 10.82 (6.77-15.41)    | 62.12 (54.67-103.43)   | 10.24 (7.83-15.75)        | 9.45 (5.86-16.72)         |
| <b>Blood</b>               |          |                                  |                       |                        |                           |                           |
| <b>PND 1</b>               | C57BL6/J | 3.57 (0.28-8.36)                 | 1.48 (1.15-1.86)      | 3.21 (0.08-8.14)       | 1.13 (0.78-2.94)          | 1.89 (0.72-2.41)          |
|                            | BTBR     | 269.63 (66.62-362.14)            | 584.05 (96.65-984.63) | 63.48 (19.49-329.68)   | 573.66 (289.40-44726.06)  | 177.46 (78.33-1239.22)    |
| <b>PND 7</b>               | C57BL6/J | 5.10 (1.55-6.47)                 | 0.43 (0.28-4.18)      | 0.71 (0.24-33.33)      | 33.24 (13.22-44.46)       | 8.55 (3.18-33.32)         |
|                            | BTBR     | 706.57 (75.20-1794.54)           | 13.02 (5.30-456.88)   | 291.29 (43.51-698.40)  | 208.47 (144.34-1441.79)   | 137.94 (102.46-1093.88)   |
| <b>Brain</b>               |          |                                  |                       |                        |                           |                           |
| <b>PND 1</b>               | C57BL6/J | 1.80 E-03 (1.40 E-03-2.50 E-03)  | 0.18 (0.16-0.20)      | 0.07 (0.04-0.10)       | 2.38 (2.20-4.24)          | 0.23 (0.16-0.28)          |
|                            | BTBR     | 182.24 (109.97-258.97)           | 10.72 (7.88-24.46)    | 26.44 (20.22-45.54)    | 871.91 (313.69-1777.77)   | 68.81 (34.11-333.76)      |
| <b>PND 7</b>               | C57BL6/J | 1.11 E-03 (5.98 E-06-1.68 E-03)  | 0.04 (0.01-0.14)      | 0.05 (0.03-0.07)       | 3.30 (1.99-11.32)         | 0.17 (0.08-0.99)          |
|                            | BTBR     | 73.41 (26.26-159.26)             | 90.58 (44.82-139.85)  | 156.94 (110.96-211.43) | 3240.09 (1679.00-3983.41) | 101.33 (99.60-201.27)     |
| <b>Whole embryos</b>       |          |                                  |                       |                        |                           |                           |
| <b>24 h pt<sup>#</sup></b> | Vehicle  | 1.00 (0.17-15.10)                | 2.15 (0.26-23.86)     | 1.97 (0.10-5.05)       | 0.95 (0.87-1.22)          | 0.99 (0.78-1.45)          |
|                            | VPA      | 24.37 (9.43-40.00)               | 4.05 (0.16-20.86)     | 7.49 (2.66-14.28)      | 0.69 (0.52-1.72)          | 0.84 (0.10-1.98)          |
|                            | VPA      | 44.10 (23.43-81.43)              | 87.31 (59.80-104.86)  | 20.62 (8.99-43.89)     | 1.33 (0.65-1.72)          | 2.38 (1.68-2.83)          |
| <b>Blood</b>               |          |                                  |                       |                        |                           |                           |
| <b>PND 1</b>               | Vehicle  | 1.34 (0.16-2.95)                 | 1.43 (0.67-2.31)      | 2.89 (0.37-5.46)       | 1.59 (0.30-3.04)          | 1.35 (0.29-2.74)          |
|                            | VPA      | 18787.27 (1632.82-49412.83)      | 25.55 (11.50-76.98)   | 42.59 (15.39-148.26)   | 1.39 (0.51-5.14)          | 2.73 (2.02-31.45)         |
| <b>PND 7</b>               | Vehicle  | 128.53 (4.38-411.96)             | 1.83 (0.06-2.40)      | 0.66 (0.03-0.97)       | 0.31 (0.05-0.58)          | 0.63 (0.06-2.09)          |
|                            | VPA      | 26087.30 (684.65-115913.87)      | 46.64 (6.54-135.20)   | 179.21 (13.53-539.35)  | 6.82 (0.12-16.31)         | 13.28 (0.41-26.26)        |
| <b>Brain</b>               |          |                                  |                       |                        |                           |                           |
| <b>PND 1</b>               | Vehicle  | 1290.96 (115.42-2902.06)         | 0.27 (0.02-0.68)      | 1.54 (0.70-2.01)       | 4.11 (2.520-5.53)         | 102.61 (55.02-166.70)     |
|                            | VPA      | 842860.55 (549485.68-1554235.28) | 76.06 (30.04-189.13)  | 379.61 (242.99-823.86) | 631.09 (437.87-2408.08)   | 840.79 (284.24-1551.41)   |
| <b>PND 7</b>               | Vehicle  | 304.32 (50.49-3552.76)           | 0.46 (0.13-0.90)      | 1.92 (0.55-3.51)       | 4.32 (3.25-76.03)         | 45.06 (35.19-155.17)      |
|                            | VPA      | 47323.96 (26011.95-366455.98)    | 148.80 (4.28-281.63)  | 343.57 (53.11-553.99)  | 947.39 (157.21-2857.32)   | 4178.18 (869.87-11594.55) |

<sup>#</sup> hours post treatment

\* median value (IQR)

**Supplementary table S3. *p*-values obtained by Mann Witney *U* test for the comparison of ERVs', cytokines' and TLRs' transcriptional levels in C57BL6/J, BTBR, vehicle- and VPA-treated mice**

|                         |                                      | ETnl   | ETnlII- $\alpha$ | ETnlII- $\beta$ | ETnlII- $\gamma$ | MusD  | IAP   | IL-1 $\beta$ | IL-6  | TNF- $\alpha$ | TLR3  | TLR4  |
|-------------------------|--------------------------------------|--------|------------------|-----------------|------------------|-------|-------|--------------|-------|---------------|-------|-------|
| <b>C57BL6/J vs BTBR</b> |                                      |        |                  |                 |                  |       |       |              |       |               |       |       |
| <b>Whole embryos</b>    | GD 10.5                              | 0.002* | 0.002            | 0.002           | 0.002            | 0.002 | 0.002 | 0.002        | 0.002 | 0.002         | 0.003 | 0.003 |
| <b>Blood</b>            | PND 1                                | 0.019  | 0.002            | 0.002           | 0.012            | 0.001 | 0.001 | 0.008        | 0.008 | 0.008         | 0.008 | 0.008 |
|                         | PND 7                                | 0.019  | 0.038            | 0.029           | 0.267            | 0.000 | 0.000 | 0.008        | 0.016 | 0.032         | 0.008 | 0.008 |
|                         | PND 23                               | 0.000  | 0.000            | 0.000           | 0.003            | 0.007 | 0.000 | x            | x     | x             | x     | x     |
|                         | PND 120                              | 0.008  | 0.008            | 0.008           | 0.008            | 0.008 | 0.008 | x            | x     | x             | x     | x     |
| <b>Brain</b>            | PND 1                                | 0.003  | 0.003            | 0.003           | 0.003            | 0.003 | 0.003 | 0.016        | 0.016 | 0.028         | 0.016 | 0.016 |
|                         | PND 7                                | 0.000  | 0.000            | 0.028           | 0.008            | 0.001 | 0.002 | 0.008        | 0.008 | 0.008         | 0.008 | 0.008 |
|                         | PND 23                               | 0.000  | 0.000            | 0.000           | 0.000            | 0.000 | 0.000 | x            | x     | x             | x     | x     |
|                         | PND 120                              | 0.008  | 0.008            | 0.008           | 0.008            | 0.008 | 0.008 | x            | x     | x             | x     | x     |
| <b>C57BL6/J</b>         |                                      |        |                  |                 |                  |       |       |              |       |               |       |       |
| <b>Blood</b>            | PND 1 vs PND 7                       | 0.421  | 0.056            | 0.548           | 0.032            | 0.310 | 0.222 | 0.841        | 0.151 | 0.690         | 0.008 | 0.095 |
|                         | PND 1 vs PND 23                      | 0.017  | 0.126            | 0.537           | 0.247            | 0.004 | 0.052 | x            | x     | x             | x     | x     |
|                         | PND 1 vs PND 120                     | 0.008  | 0.008            | 0.008           | 0.008            | 0.008 | 0.008 | x            | x     | x             | x     | x     |
|                         | PND 7 vs PND 23                      | 1.000  | 0.126            | 0.329           | 0.126            | 0.247 | 0.792 | x            | x     | x             | x     | x     |
| <b>Brain</b>            | PND 7 vs PND 120                     | 0.008  | 0.008            | 0.008           | 0.008            | 0.008 | 0.008 | x            | x     | x             | x     | x     |
|                         | PND 23 vs PND 120                    | 0.004  | 0.004            | 0.004           | 0.004            | 0.004 | 0.004 | x            | x     | x             | x     | x     |
|                         | PND 1 vs PND 7                       | 0.286  | 0.050            | 0.032           | 0.032            | 0.063 | 0.730 | 0.111        | 0.111 | 0.730         | 0.413 | 0.905 |
|                         | PND 1 vs PND 23                      | 0.067  | 1.000            | 1.000           | 1.000            | 1.000 | 1.000 | x            | x     | x             | x     | x     |
|                         | PND 1 vs PND 120                     | 0.028  | 0.016            | 0.016           | 0.016            | 0.016 | 0.016 | x            | x     | x             | x     | x     |
|                         | PND 7 vs PND 23                      | 0.792  | 0.429            | 0.662           | 0.429            | 0.662 | 0.662 | x            | x     | x             | x     | x     |
|                         | PND 7 vs PND 120                     | 0.222  | 0.008            | 0.095           | 0.008            | 0.095 | 0.095 | x            | x     | x             | x     | x     |
|                         | PND 23 vs PND 120                    | 0.429  | 0.537            | 0.004           | 0.004            | 0.017 | 0.004 | x            | x     | x             | x     | x     |
| <b>BTBR</b>             |                                      |        |                  |                 |                  |       |       |              |       |               |       |       |
| <b>Blood</b>            | PND 1 vs PND 7                       | 0.552  | 0.603            | 0.295           | 0.046            | 0.603 | 0.000 | 0.421        | 0.222 | 0.421         | 0.310 | 0.841 |
|                         | PND 1 vs PND 23                      | 0.035  | 0.356            | 0.780           | 0.905            | 0.497 | 0.079 | x            | x     | x             | x     | x     |
|                         | PND 1 vs PND 120                     | 0.001  | 0.001            | 0.050           | 0.019            | 0.001 | 0.001 | x            | x     | x             | x     | x     |
|                         | PND 7 vs PND 23                      | 0.114  | 0.085            | 0.349           | 0.003            | 0.020 | 0.008 | x            | x     | x             | x     | x     |
| <b>Brain</b>            | PND 7 vs PND 120                     | 0.000  | 0.000            | 0.000           | 0.000            | 0.000 | 0.027 | x            | x     | x             | x     | x     |
|                         | PND 23 vs PND 120                    | 0.001  | 0.001            | 0.001           | 0.001            | 0.001 | 0.001 | x            | x     | x             | x     | x     |
|                         | PND 1 vs PND 7                       | 0.131  | 0.603            | 1.000           | 0.503            | 0.261 | 0.824 | 0.095        | 0.151 | 0.008         | 0.056 | 0.548 |
|                         | PND 1 vs PND 23                      | 0.182  | 0.053            | 0.315           | 0.079            | 0.400 | 0.028 | x            | x     | x             | x     | x     |
|                         | PND 1 vs PND 120                     | 0.001  | 0.004            | 0.001           | 0.083            | 0.001 | 0.001 | x            | x     | x             | x     | x     |
|                         | PND 7 vs PND 23                      | 0.008  | 0.132            | 0.863           | 0.605            | 0.099 | 0.197 | x            | x     | x             | x     | x     |
|                         | PND 7 vs PND 120                     | 0.090  | 0.743            | 0.028           | 0.019            | 0.000 | 0.001 | x            | x     | x             | x     | x     |
|                         | PND 23 vs PND 120                    | 0.001  | 0.001            | 0.013           | 0.013            | 0.001 | 0.001 | x            | x     | x             | x     | x     |
| <b>Vehicle vs VPA</b>   |                                      |        |                  |                 |                  |       |       |              |       |               |       |       |
| <b>Whole embryos</b>    | Veh 24h pt vs VPA 3h pt <sup>#</sup> | 0.000  | 0.030            | 0.176           | 0.000            | 0.000 | 0.000 | 0.005        | 0.543 | 0.063         | 0.342 | 0.569 |
|                         | Veh 24h pt vs VPA 24h pt             | 0.002  | 0.077            | 0.042           | 0.002            | 0.001 | 0.001 | 0.002        | 0.000 | 0.042         | 0.780 | 0.001 |
|                         | VPA 3h pt vs VPA 24h pt              | 0.959  | 0.979            | 0.407           | 0.437            | 0.569 | 0.365 | 0.057        | 0.000 | 0.231         | 0.549 | 0.003 |
| <b>Blood</b>            | PND 1                                | 0.000  | 0.000            | 0.002           | 0.000            | 0.000 | 0.000 | 0.000        | 0.000 | 0.000         | 0.818 | 0.041 |
|                         | PND 7                                | 0.401  | 0.006            | 0.000           | 0.006            | 0.000 | 0.006 | 0.000        | 0.000 | 0.000         | 0.180 | 0.032 |
|                         | PND 23                               | 0.001  | 0.198            | 0.000           | 0.003            | 0.028 | 0.078 | x            | x     | x             | x     | x     |
|                         | PND 120                              | 0.225  | 0.168            | 0.019           | 0.003            | 0.728 | 0.068 | x            | x     | x             | x     | x     |
| <b>Brain</b>            | PND 1                                | 0.000  | 0.000            | 0.000           | 0.000            | 0.000 | 0.000 | 0.000        | 0.000 | 0.000         | 0.002 | 0.004 |
|                         | PND 7                                | 0.000  | 0.000            | 0.000           | 0.001            | 0.000 | 0.000 | 0.000        | 0.000 | 0.000         | 0.005 | 0.001 |
|                         | PND 23                               | 0.000  | 0.000            | 0.000           | 0.010            | 0.000 | 0.000 | x            | x     | x             | x     | x     |
|                         | PND 120                              | 0.000  | 0.000            | 0.000           | 0.000            | 0.000 | 0.000 | x            | x     | x             | x     | x     |
| <b>Vehicle</b>          |                                      |        |                  |                 |                  |       |       |              |       |               |       |       |
| <b>Blood</b>            | PND 1 vs PND 7                       | 0.000  | 0.331            | 0.000           | 0.009            | 0.047 | 0.000 | 0.000        | 0.820 | 0.392         | 0.065 | 0.589 |
|                         | PND 1 vs PND 23                      | 0.000  | 0.011            | 0.406           | 0.110            | 0.000 | 0.000 | x            | x     | x             | x     | x     |
|                         | PND 1 vs PND 120                     | 0.186  | 0.406            | 0.000           | 0.106            | 0.000 | 0.001 | x            | x     | x             | x     | x     |
|                         | PND 7 vs PND 23                      | 0.169  | 0.000            | 0.000           | 0.000            | 0.000 | 0.009 | x            | x     | x             | x     | x     |
| <b>Brain</b>            | PND 7 vs PND 120                     | 0.000  | 0.104            | 0.651           | 0.243            | 0.000 | 0.651 | x            | x     | x             | x     | x     |
|                         | PND 23 vs PND 120                    | 0.000  | 0.266            | 0.000           | 0.000            | 0.008 | 0.003 | x            | x     | x             | x     | x     |
|                         | PND 1 vs PND 7                       | 0.905  | 1.000            | 0.720           | 0.720            | 0.616 | 0.550 | 0.470        | 0.270 | 0.376         | 0.366 | 0.445 |
|                         | PND 1 vs PND 23                      | 0.270  | 0.936            | 0.437           | 0.810            | 0.574 | 0.769 | x            | x     | x             | x     | x     |
|                         | PND 1 vs PND 120                     | 0.035  | 0.728            | 0.728           | 0.574            | 0.247 | 0.247 | x            | x     | x             | x     | x     |
|                         | PND 7 vs PND 23                      | 0.560  | 0.980            | 0.297           | 0.820            | 0.527 | 0.781 | x            | x     | x             | x     | x     |
|                         | PND 7 vs PND 120                     | 0.013  | 0.595            | 0.462           | 0.374            | 0.067 | 0.067 | x            | x     | x             | x     | x     |
|                         | PND 23 vs PND 120                    | 0.024  | 0.551            | 0.799           | 0.478            | 0.020 | 0.160 | x            | x     | x             | x     | x     |
| <b>VPA</b>              |                                      |        |                  |                 |                  |       |       |              |       |               |       |       |
| <b>Blood</b>            | PND 1 vs PND 7                       | 0.000  | 0.000            | 0.001           | 0.000            | 0.050 | 0.000 | 0.809        | 0.973 | 0.654         | 0.699 | 0.937 |
|                         | PND 1 vs PND 23                      | 0.000  | 0.000            | 0.266           | 0.000            | 0.012 | 0.000 | x            | x     | x             | x     | x     |
|                         | PND 1 vs PND 120                     | 0.000  | 0.001            | 0.000           | 0.087            | 0.979 | 0.002 | x            | x     | x             | x     | x     |
|                         | PND 7 vs PND 23                      | 0.786  | 0.347            | 0.004           | 0.976            | 0.456 | 0.928 | x            | x     | x             | x     | x     |
| <b>Brain</b>            | PND 7 vs PND 120                     | 0.001  | 0.531            | 0.000           | 0.134            | 0.148 | 0.820 | x            | x     | x             | x     | x     |
|                         | PND 23 vs PND 120                    | 0.001  | 0.936            | 0.000           | 0.110            | 0.087 | 0.769 | x            | x     | x             | x     | x     |
|                         | PND 1 vs PND 7                       | 0.095  | 0.036            | 0.742           | 0.231            | 0.595 | 0.742 | 0.001        | 0.728 | 0.225         | 0.818 | 0.093 |
|                         | PND 1 vs PND 23                      | 0.001  | 0.011            | 0.81            | 0.002            | 0.022 | 0.004 | x            | x     | x             | x     | x     |
|                         | PND 1 vs PND 120                     | 0.887  | 0.843            | 0.242           | 0.843            | 0.178 | 0.319 | x            | x     | x             | x     | x     |
|                         | PND 7 vs PND 23                      | 0.033  | 0.375            | 0.488           | 0.458            | 0.105 | 0.019 | x            | x     | x             | x     | x     |
|                         | PND 7 vs PND 120                     | 0.106  | 0.031            | 0.013           | 0.231            | 0.118 | 0.231 | x            | x     | x             | x     | x     |
|                         | PND 23 vs PND 120                    | 0.002  | 0.016            | 0.152           | 0.003            | 0.001 | 0.000 | x            | x     | x             | x     | x     |

<sup>#</sup> hours post treatment  
\* *p*-value

Supplementary table S4. Spearman correlation analysis in C57BL6/J and BTBR mice

|                                  |                 |                                  | <b>IL-1<math>\beta</math></b> |                | <b>IL-6</b> |                | <b>TNF-<math>\alpha</math></b> |                | <b>TLR3</b> |                | <b>TLR4</b> |                |
|----------------------------------|-----------------|----------------------------------|-------------------------------|----------------|-------------|----------------|--------------------------------|----------------|-------------|----------------|-------------|----------------|
|                                  |                 |                                  | <b>Rho</b>                    | <b>p-value</b> | <b>Rho</b>  | <b>p-value</b> | <b>Rho</b>                     | <b>p-value</b> | <b>Rho</b>  | <b>p-value</b> | <b>Rho</b>  | <b>p-value</b> |
| <b>Whole embryos<br/>GD 10.5</b> | <b>C57BL6/J</b> | <b>ETnI</b>                      | 0.300                         | 0.624          | 0.600       | 0.285          | -0.100                         | 0.873          | 0.000       | 1.000          | -0.400      | 0.507          |
|                                  |                 | <b>ETnII-<math>\alpha</math></b> | 0.200                         | 0.747          | -0.100      | 0.873          | 0.500                          | 0.391          | -0.100      | 0.873          | -0.400      | 0.505          |
|                                  |                 | <b>ETnII-<math>\beta</math></b>  | 0.200                         | 0.747          | -0.100      | 0.873          | 0.100                          | 0.873          | 0.500       | 0.391          | -0.100      | 0.873          |
|                                  |                 | <b>ETnII-<math>\gamma</math></b> | 0.200                         | 0.747          | -0.100      | 0.873          | 0.100                          | 0.873          | 0.500       | 0.391          | -0.100      | 0.873          |
|                                  |                 | <b>MusD</b>                      | 0.200                         | 0.747          | -0.100      | 0.873          | 0.500                          | 0.391          | -0.100      | 0.873          | -0.400      | 0.505          |
|                                  |                 | <b>IAP</b>                       | 0.500                         | 0.391          | -0.200      | 0.747          | 0.300                          | 0.624          | 0.200       | 0.747          | -0.200      | 0.747          |
|                                  | <b>BTBR</b>     | <b>ETnI</b>                      | 0.262                         | 0.531          | 0.333       | 0.420          | 0.238                          | 0.570          | 0.714*      | 0.047          | 0.690       | 0.058          |
|                                  |                 | <b>ETnII-<math>\alpha</math></b> | 0.214                         | 0.610          | 0.119       | 0.779          | 0.214                          | 0.610          | -0.262      | 0.531          | -0.310      | 0.456          |
|                                  |                 | <b>ETnII-<math>\beta</math></b>  | 0.717*                        | 0.047          | 0.405       | 0.320          | 0.857**                        | 0.007          | 0.554       | 0.170          | 0.476       | 0.233          |
|                                  |                 | <b>ETnII-<math>\gamma</math></b> | 0.595                         | 0.120          | 0.548       | 0.160          | 0.714*                         | 0.047          | 0.571       | 0.139          | 0.190       | 0.651          |
|                                  |                 | <b>MusD</b>                      | 0.833*                        | 0.010          | 0.786*      | 0.021          | 0.714*                         | 0.047          | 0.667       | 0.071          | 0.381       | 0.352          |
|                                  |                 | <b>IAP</b>                       | 0.524                         | 0.183          | 0.286       | 0.493          | 0.595                          | 0.120          | 0.310       | 0.456          | 0.071       | 0.867          |

\* significant correlation

\*\*highly significant correlation

Supplementary table S5. Spearman correlation analysis in vehicle- and VPA-treated CD-1mice

|                                                   |                        |                                  | ETnI    |         | ETnII- $\alpha$ |         | ETnII- $\beta$ |         | ETnII- $\gamma$ |         | MusD    |         | IAP     |         |
|---------------------------------------------------|------------------------|----------------------------------|---------|---------|-----------------|---------|----------------|---------|-----------------|---------|---------|---------|---------|---------|
|                                                   |                        |                                  | Rho     | p-value | Rho             | p-value | Rho            | p-value | Rho             | p-value | Rho     | p-value | Rho     | p-value |
| <b>Whole embryos</b><br><b>24h pt<sup>#</sup></b> | <b>Vehicle-treated</b> | <b>ETnI</b>                      | 1.000   |         | 0.815**         | 0.000   | 0.814**        | 0.000   | 0.451*          | 0.046   | 0.474*  | 0.035   | 0.463*  | 0.040   |
|                                                   |                        | <b>ETnII-<math>\alpha</math></b> | 0.815** | 0.000   | 1.000           |         | 0.869**        | 0.000   | 0.605**         | 0.005   | 0.606** | 0.005   | 0.595** | 0.006   |
|                                                   |                        | <b>ETnII-<math>\beta</math></b>  | 0.814** | 0.000   | 0.869**         | 0.000   | 1.000          |         | 0.654**         | 0.002   | 0.737** | 0.000   | 0.714** | 0.000   |
|                                                   |                        | <b>ETnII-<math>\gamma</math></b> | 0.451*  | 0.046   | 0.605**         | 0.005   | 0.654**        | 0.002   | 1.000           |         | 0.899** | 0.000   | 0.874** | 0.000   |
|                                                   |                        | <b>MusD</b>                      | 0.474*  | 0.035   | 0.606**         | 0.005   | 0.637**        | 0.000   | 0.899**         | 0.000   | 1.000   |         | 0.947** | 0.000   |
|                                                   |                        | <b>IAP</b>                       | 0.463*  | 0.040   | 0.595**         | 0.006   | 0.714**        | 0.000   | 0.874**         | 0.000   | 0.947** | 0.000   | 1.000   |         |
| <b>3h pt</b>                                      | <b>VPA-treated</b>     | <b>ETnI</b>                      | 1.000   |         | 0.394*          | 0.046   | 0.568**        | 0.002   | -0.399*         | 0.043   | -0.422* | 0.032   | -0.280  | 0.166   |
|                                                   |                        | <b>ETnII-<math>\alpha</math></b> | 0.394*  | 0.046   | 1.000           |         | 0.586**        | 0.002   | -0.169          | 0.410   | -0.317  | 0.115   | -0.031  | 0.880   |
|                                                   |                        | <b>ETnII-<math>\beta</math></b>  | 0.568** | 0.002   | 0.586**         | 0.002   | 1.000          |         | -0.309          | 0.124   | -0.376  | 0.059   | -0.311  | 0.121   |
|                                                   |                        | <b>ETnII-<math>\gamma</math></b> | -0.399  | 0.043   | -0.0169         | 0.410   | -0.309         | 0.124   | 1.000           |         | 0.875** | 0.000   | 0.707** | 0.000   |
|                                                   |                        | <b>MusD</b>                      | -0.422* | 0.032   | -0.317          | 0.115   | -0.376         | 0.059   | 0.875**         | 0.000   | 1.000   |         | 0.703** | 0.001   |
|                                                   |                        | <b>IAP</b>                       | -0.280  | 0.166   | -0.031          | 0.880   | -0.311         | 0.121   | 0.707**         | 0.000   | 0.703** | 0.000   | 1.000   |         |
| <b>24h pt</b>                                     | <b>VPA-treated</b>     | <b>ETnI</b>                      | 1.000   |         | 0.744**         | 0.001   | 0.756**        | 0.001   | 0.465           | 0.070   | 0.465   | 0.070   | 0.365   | 0.165   |
|                                                   |                        | <b>ETnII-<math>\alpha</math></b> | 0.744** | 0.001   | 1.000           |         | 0.959**        | 0.000   | 0.474           | 0.064   | 0.397   | 0.128   | 0.324   | 0.222   |
|                                                   |                        | <b>ETnII-<math>\beta</math></b>  | 0.756** | 0.001   | 0.959**         | 0.000   | 1.000          |         | 0.462           | 0.072   | 0.391   | 0.134   | 0.329   | 0.213   |
|                                                   |                        | <b>ETnII-<math>\gamma</math></b> | 0.465   | 0.070   | 0.474           | 0.064   | 0.462          | 0.072   | 1.000           |         | 0.979** | 0.000   | 0.926** | 0.000   |
|                                                   |                        | <b>MusD</b>                      | 0.465   | 0.070   | 0.397           | 0.128   | 0.391          | 0.134   | 0.979**         | 0.000   | 1.000   |         | 0.941** | 0.000   |
|                                                   |                        | <b>IAP</b>                       | 0.365   | 0.165   | 0.324           | 0.222   | 0.329          | 0.213   | 0.926**         | 0.000   | 0.941** | 0.000   | 1.000   |         |

\* significant correlation

\*\*highly significant correlation

# hours post treatment

Supplementary table S6. Spearman correlation analysis in vehicle- and VPA-treated CD-1 mice

|                                                   |                        |                                  | <u>IL-1<math>\beta</math></u> |         | <u>IL-6</u> |         | <u>TNF-<math>\alpha</math></u> |         | <u>TLR3</u> |         | <u>TLR4</u> |         |
|---------------------------------------------------|------------------------|----------------------------------|-------------------------------|---------|-------------|---------|--------------------------------|---------|-------------|---------|-------------|---------|
|                                                   |                        |                                  | Rho                           | p-value | Rho         | p-value | Rho                            | p-value | Rho         | p-value | Rho         | p-value |
| <b>Whole embryos</b><br><b>24h pt<sup>#</sup></b> | <b>Vehicle-treated</b> | <b>ETnI</b>                      | -0.552                        | 0.123   | -0.536      | 0.137   | -0.603                         | 0.086   | 0.167       | 0.668   | -0.402      | 0.284   |
|                                                   |                        | <b>ETnII-<math>\alpha</math></b> | -0.310                        | 0.417   | 0.226       | 0.559   | 0.192                          | 0.620   | -0.567      | 0.112   | -0.519      | 0.152   |
|                                                   |                        | <b>ETnII-<math>\beta</math></b>  | -0.385                        | 0.306   | -0.218      | 0.574   | -0.351                         | 0.354   | -0.083      | 0.831   | -0.343      | 0.366   |
|                                                   |                        | <b>ETnII-<math>\gamma</math></b> | -0.301                        | 0.431   | 0.209       | 0.589   | 0.092                          | 0.814   | -0.417      | 0.265   | -0.167      | 0.667   |
|                                                   |                        | <b>MusD</b>                      | 0.075                         | 0.847   | 0.167       | 0.667   | -0.067                         | 0.864   | -0.083      | 0.831   | -0.226      | 0.559   |
|                                                   |                        | <b>IAP</b>                       | -0.251                        | 0.515   | 0.151       | 0.699   | -0.050                         | 0.898   | -0.283      | 0.460   | -0.159      | 0.683   |
| <b>3h pt</b>                                      | <b>VPA-treated</b>     | <b>ETnI</b>                      | 0.296                         | 0.377   | 0.055       | 0.873   | -0.036                         | 0.915   | -0.401      | 0.222   | -0.145      | 0.670   |
|                                                   |                        | <b>ETnII-<math>\alpha</math></b> | -0.032                        | 0.926   | 0.136       | 0.689   | -0.082                         | 0.811   | 0.374       | 0.258   | 0.600       | 0.051   |
|                                                   |                        | <b>ETnII-<math>\beta</math></b>  | -0.046                        | 0.894   | 0.336       | 0.312   | 0.000                          | 1.000   | 0.506       | 0.113   | 0.609*      | 0.047   |
|                                                   |                        | <b>ETnII-<math>\gamma</math></b> | -0.269                        | 0.424   | 0.685*      | 0.029   | -0.182                         | 0.593   | 0.109       | 0.749   | -0.155      | 0.650   |
|                                                   |                        | <b>MusD</b>                      | -0.264                        | 0.432   | 0.373       | 0.259   | -0.182                         | 0.593   | 0.150       | 0.659   | -0.118      | 0.729   |
|                                                   |                        | <b>IAP</b>                       | 0.191                         | 0.573   | -0.018      | 0.958   | 0.218                          | 0.519   | 0.073       | 0.831   | 0.136       | 0.689   |
| <b>24h pt</b>                                     | <b>VPA-treated</b>     | <b>ETnI</b>                      | -0.200                        | 0.580   | -0.309      | 0.385   | 0.079                          | 0.829   | -0.418      | 0.229   | -0.115      | 0.751   |
|                                                   |                        | <b>ETnII-<math>\alpha</math></b> | -0.091                        | 0.803   | -0.309      | 0.385   | 0.055                          | 0.881   | -0.382      | 0.276   | -0.018      | 0.96    |
|                                                   |                        | <b>ETnII-<math>\beta</math></b>  | -0.127                        | 0.726   | -0.370      | 0.293   | 0.091                          | 0.803   | -0.455      | 0.187   | -0.067      | 0.855   |
|                                                   |                        | <b>ETnII-<math>\gamma</math></b> | 0.164                         | 0.651   | 0.127       | 0.726   | 0.248                          | 0.489   | -0.576      | 0.082   | -0.139      | 0.701   |
|                                                   |                        | <b>MusD</b>                      | 0.176                         | 0.627   | 0.200       | 0.580   | 0.248                          | 0.489   | -0.636*     | 0.048   | -0.248      | 0.489   |
|                                                   |                        | <b>IAP</b>                       | 0.079                         | 0.829   | 0.164       | 0.651   | 0.164                          | 0.651   | -0.479      | 0.162   | -0.030      | 0.934   |
| <b>Brain</b><br><b>PND 1 + PND 7</b>              | <b>Vehicle-treated</b> | <b>ETnI</b>                      | 0.488*                        | 0.013   | 0.135       | 0.519   | 0.078                          | 0.712   | -0.099      | 0.748   | 0.017       | 0.957   |
|                                                   |                        | <b>ETnII-<math>\alpha</math></b> | 0.552**                       | 0.004   | 0.292       | 0.157   | 0.178                          | 0.395   | 0.006       | 0.986   | 0.039       | 0.901   |
|                                                   |                        | <b>ETnII-<math>\beta</math></b>  | -0.027                        | 0.898   | 0.158       | 0.449   | 0.122                          | 0.563   | -0.105      | 0.734   | -0.028      | 0.929   |
|                                                   |                        | <b>ETnII-<math>\gamma</math></b> | 0.546**                       | 0.005   | 0.138       | 0.509   | 0.052                          | 0.804   | -0.162      | 0.596   | -0.003      | 0.993   |
|                                                   |                        | <b>MusD</b>                      | 0.523**                       | 0.007   | 0.278       | 0.179   | 0.227                          | 0.275   | -0.237      | 0.436   | 0.121       | 0.694   |
|                                                   |                        | <b>IAP</b>                       | 0.461*                        | 0.020   | 0.028       | 0.893   | 0.138                          | 0.509   | -0.525      | 0.065   | -0.113      | 0.714   |
|                                                   | <b>VPA-treated</b>     | <b>ETnI</b>                      | 0.223                         | 0.284   | -0.256      | 0.216   | 0.351                          | 0.086   | -0.0135     | 0.914   | -0.224      | 0.484   |
|                                                   |                        | <b>ETnII-<math>\alpha</math></b> | 0.455*                        | 0.022   | 0.318       | 0.122   | -0.002                         | 0.993   | 0.168       | 0.602   | 0.196       | 0.697   |
|                                                   |                        | <b>ETnII-<math>\beta</math></b>  | 0.032                         | 0.880   | -0.083      | 0.693   | 0.083                          | 0.694   | -0.154      | 0.633   | 0.028       | 0.931   |
|                                                   |                        | <b>ETnII-<math>\gamma</math></b> | 0.466*                        | 0.019   | 0.059       | 0.778   | -0.090                         | 0.670   | -0.469      | 0.124   | -0.224      | 0.484   |
|                                                   |                        | <b>MusD</b>                      | 0.715**                       | 0.000   | 0.063       | 0.764   | -0.087                         | 0.678   | -0.552      | 0.063   | -0.699*     | 0.011   |
|                                                   |                        | <b>IAP</b>                       | 0.420*                        | 0.037   | -0.151      | 0.472   | 0.117                          | 0.579   | -0.510      | 0.090   | -0.091      | 0.779   |

\* significant correlation

\*\*highly significant correlation

# hours post treatment
